# Supplementary material
Source: PubMed Central journal article supplement (PMC2643492)

Untransfected COS-7 cells

-18:1

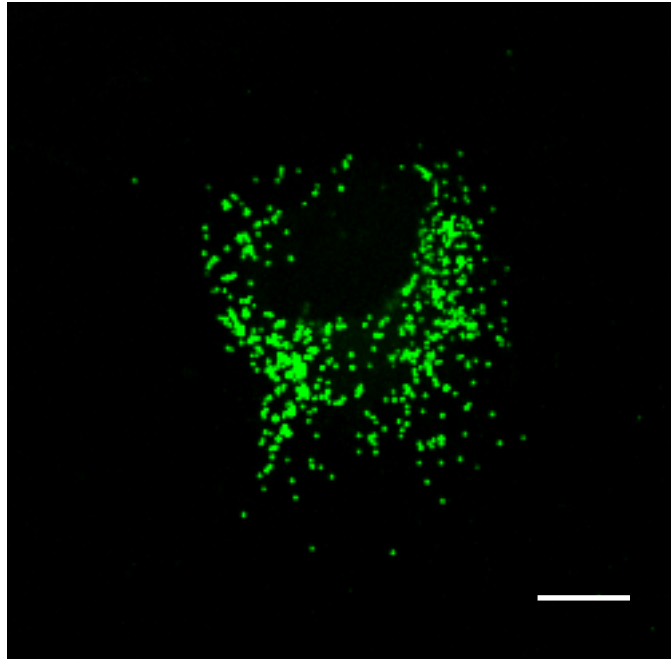

+18:1

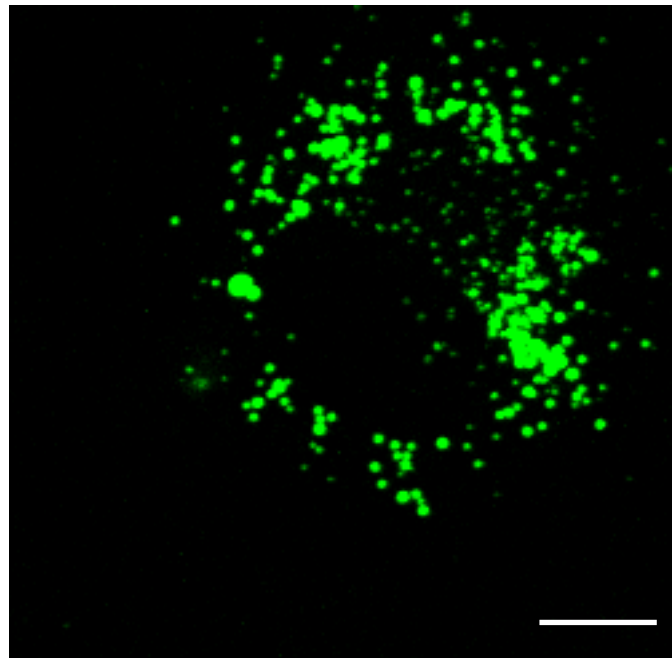

## Supplemental figure 2

A.

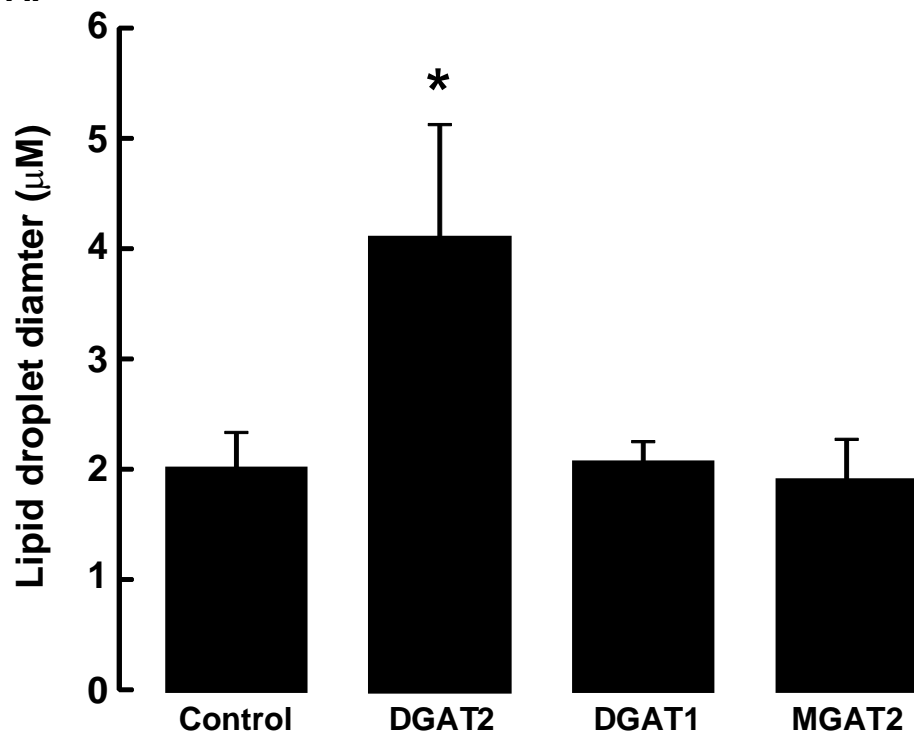

B.

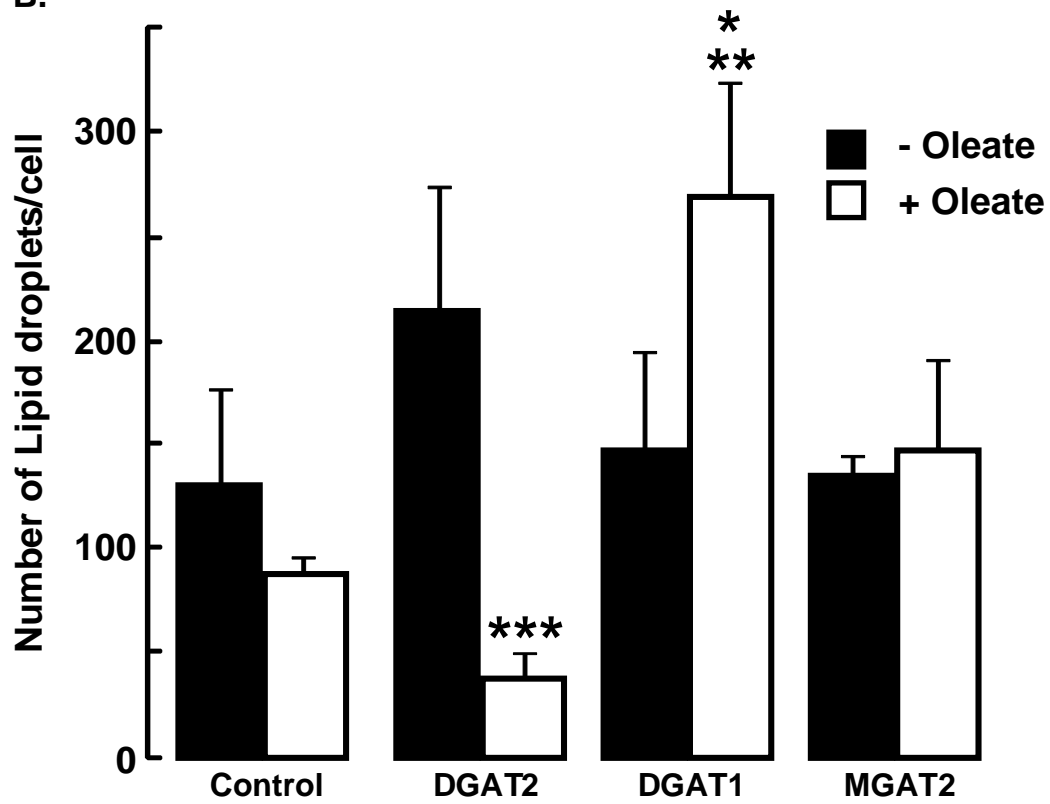

**Mito(1491)**

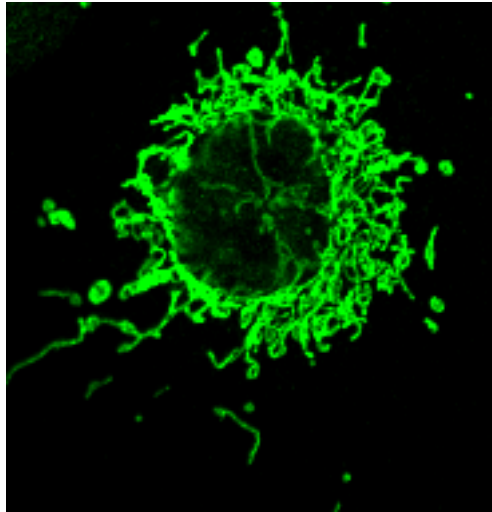

**MitoTracker Red**

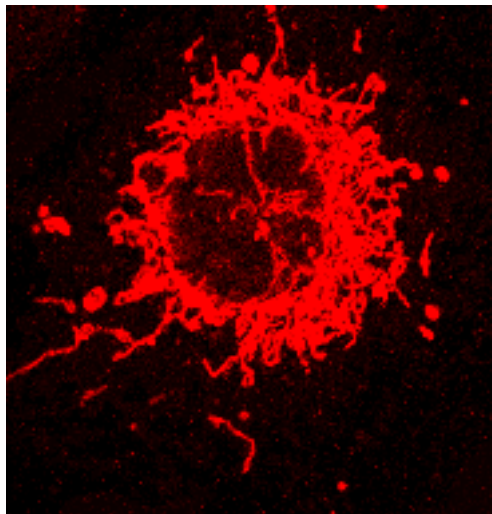

**Merge**

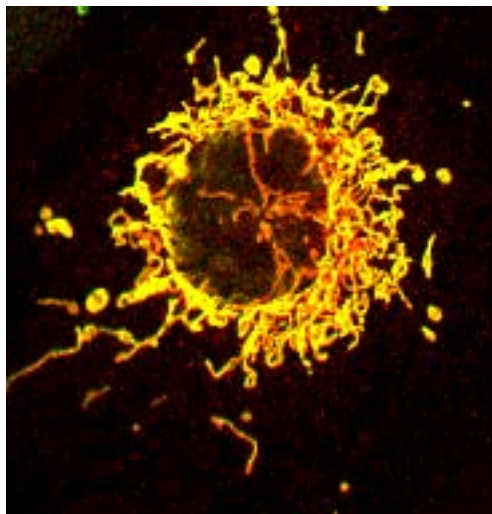

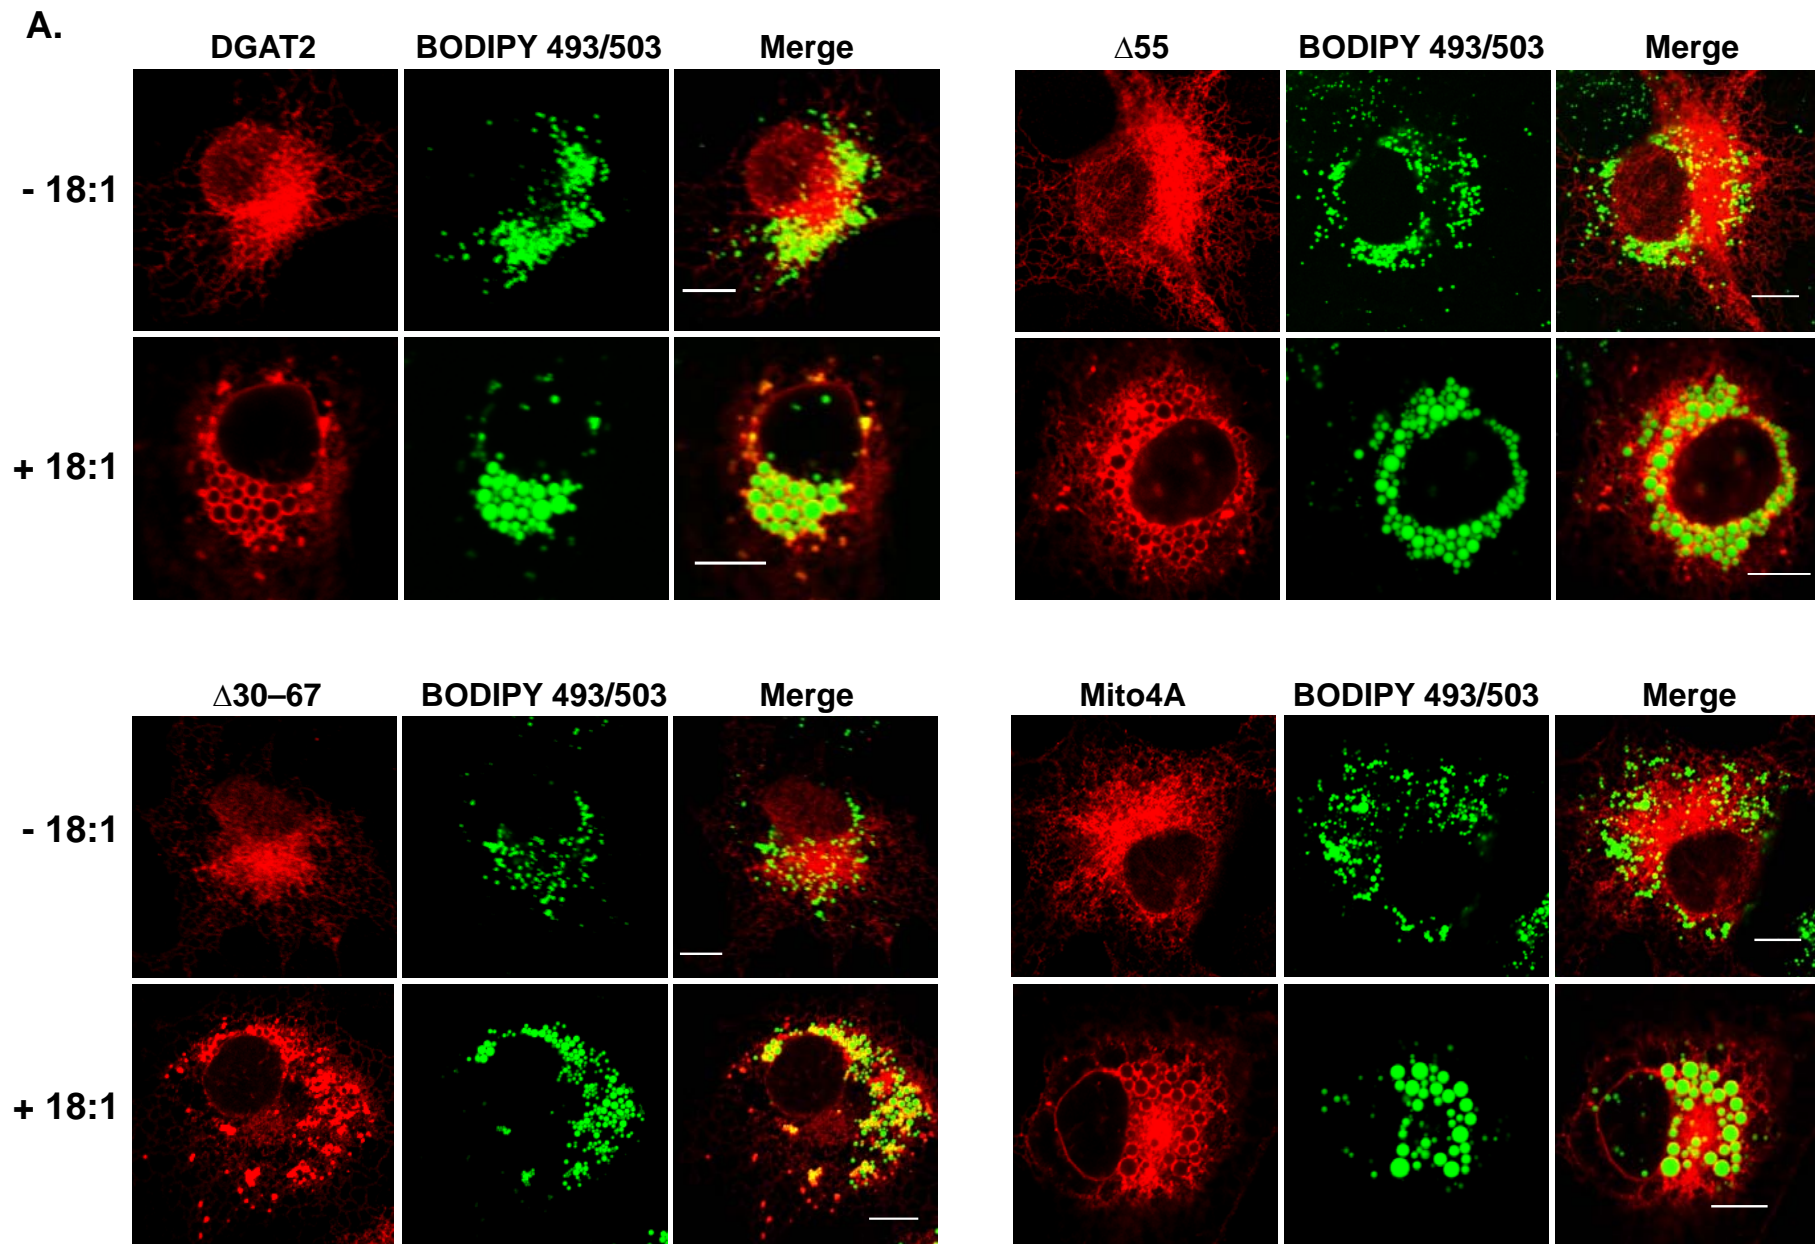

B.

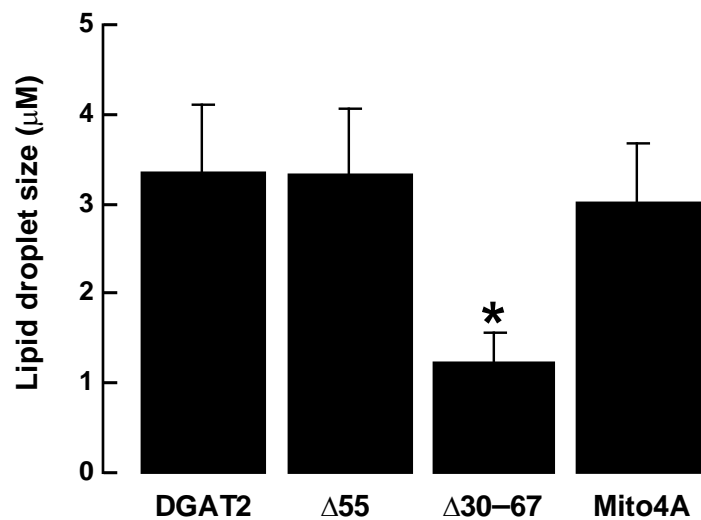

C.

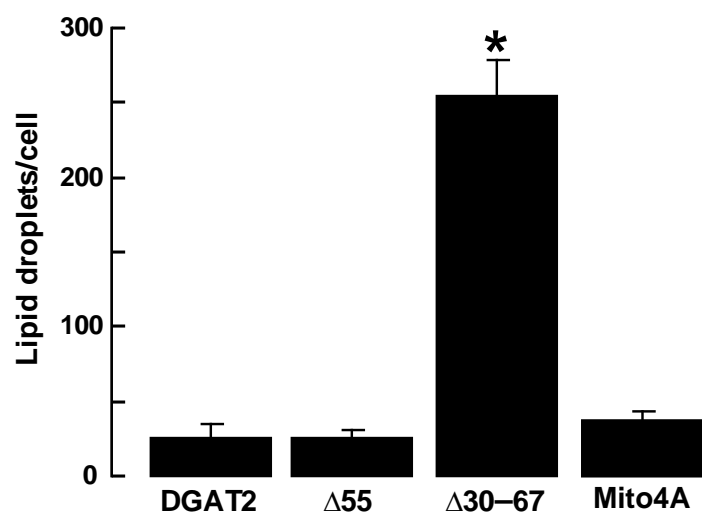

Supplement: M805768200_1.pdf [file M805768200_1.pdf]
